# Supplementary material for: A stem cell population at the anorectal junction maintains homeostasis and participates in tissue regeneration
Source: PubMed Central journal article supplement (PMC8115161; doi:10.1038/s41467-021-23034-x), 2021-05-12
Supplement: 41467_2021_23034_MOESM1_ESM.pdf [file 41467_2021_23034_MOESM1_ESM.pdf]

## Supplementary information

### **A stem cell population at the anorectal junction maintains homeostasis and participates in tissue regeneration**

Louciné Mitoyan<sup>1</sup>, Véronique Chevrier<sup>1</sup>, Hector Hernandez-Vargas<sup>2,3</sup>, Alexane Ollivier<sup>1</sup>, Zeinab Homayed<sup>4</sup>, Julie Pannequin<sup>4</sup>, Flora Poizat<sup>5</sup>, Cécile De Biasi-Cador<sup>5</sup>, Emmanuelle Charafe-Jauffret<sup>1,5</sup>, Christophe Ginestier<sup>1</sup>, and Géraldine Guasch<sup>1\*</sup>

#### **Supplementary Figure 1. Active renewal occurring in the anorectal transition zone.**

**a.** Immunofluorescence staining shows the squamous nature of the anal canal and the TZ expressing the Krt14 (red) and the glandular nature of the rectum expressing the Krt8 (white) (n=4 independent experiments from 4 mice). **b.** Krt17 (white) is strongly expressed at the TZ and weakly in anal canal cells proximal to the TZ. Section is from mouse anorectal day 31 oil control (n=22 independent experiments from 25 mice). **c.** Proliferative cells are detected at the TZ at a higher rate compared to the anal canal. Quantification of the % of Edu positive cells in TZ and anal canal area (Source data are provided as a source data file). Edu+ cells were quantified based on differential CD34 expression found in the TZ compared to the anal canal as previously described<sup>11,38</sup>. At least 9 different areas were analyzed for TZ and anal canal for each mouse (n=5). Total number of cells was counted using DAPI staining (reported as 100%) in TZ and anal canal. Paired t test two-tailed; error bars, mean  $\pm$  SEM \*\*\*p<0.0001. Representative image of Edu positive cells (nuclear white staining) at the TZ and in the anal canal area. Source data for the Edu quantification is provided as a Source Data file. **d.** Unipotency of Krt17+ TZ cells (green) during long-term lineage tracing (n=3 mice) (left image) and representative images of n=3 biologically independent samples of oil control injected mice

analyzed after two days of chase and stained with Krt17 in white and Krt8 in red. Dashed lines delineate the epithelium from the stroma. Scale bars are 50  $\mu\text{m}$ .

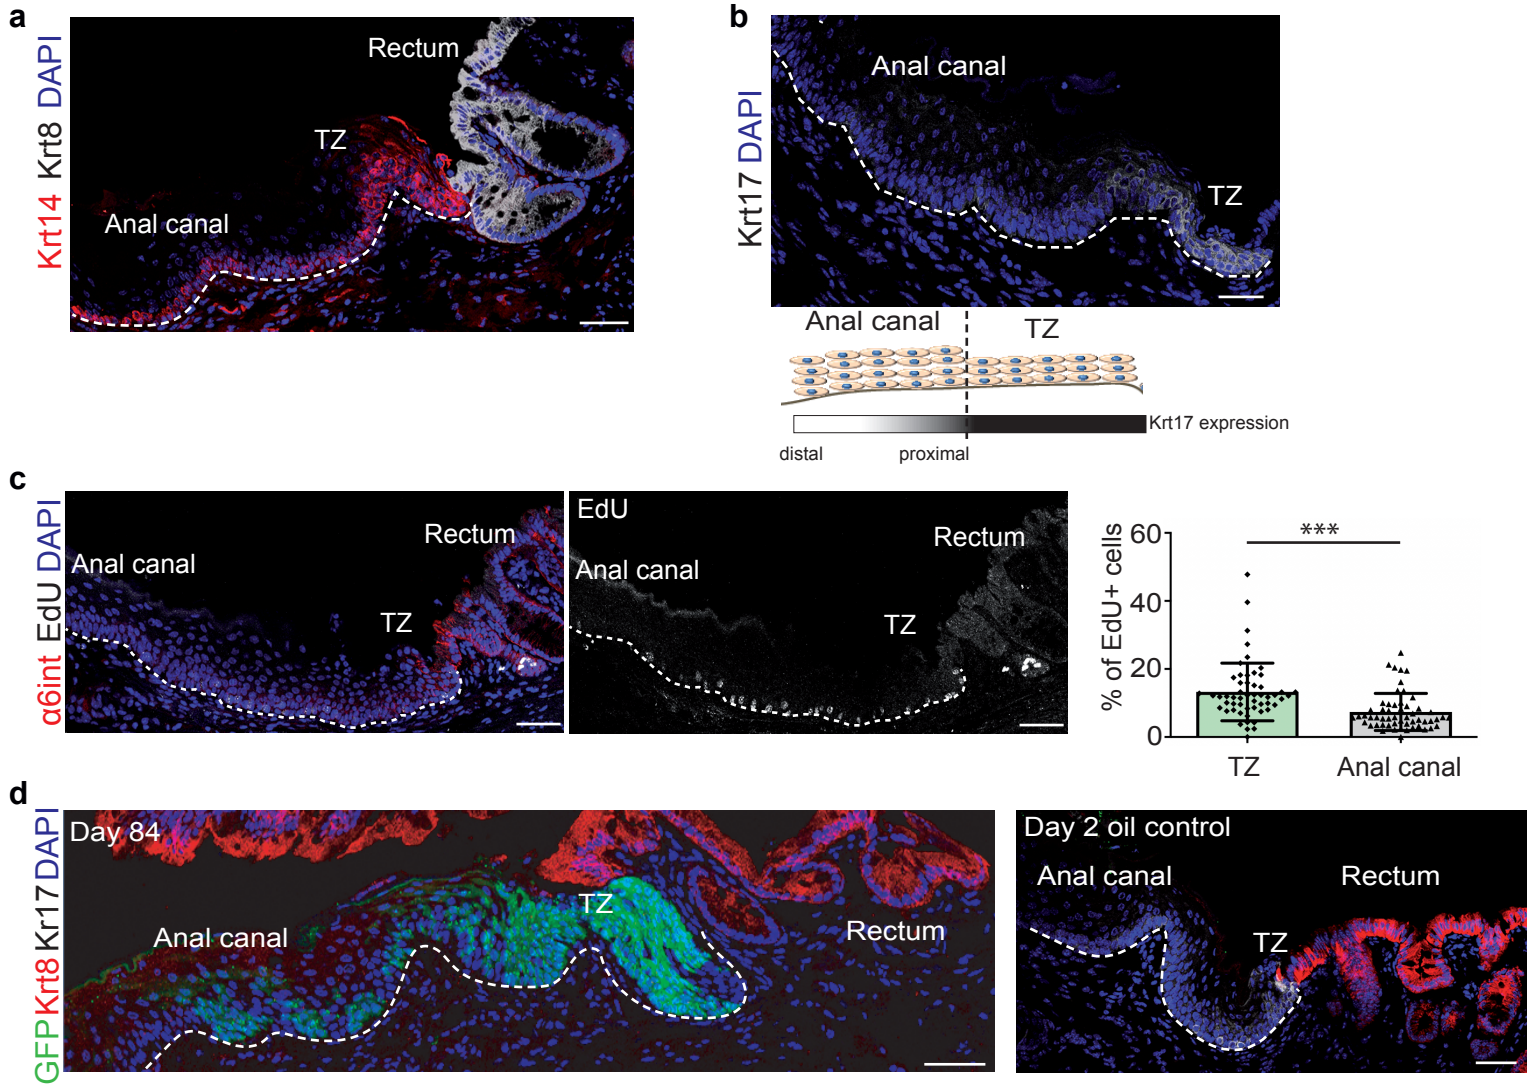

## Supplementary Figure 2. Expression of *Krt17* transcript in the anorectal region.

**a,b.** high quality in-situ hybridization (RNAScope) shows expression of *Krt17* in the anal TZ. Representative images of n=3 biologically independent samples in which fluorescence has been quantified in the absence or presence of 2 days tamoxifen injection. Insets are zoom in 1.2 fold (AC RNA), 1.4 fold (TZ RNA), 1.3 fold (AC protein), 1.25 fold (TZ protein). **b.** Positive control shows expression of *Actin* transcript in all tissue and **c.** negative control shows background level. Insets are zoom in 1.42 fold (AC and TZ RNA positive control) and 1.6 fold (AC and TZ RNA negative control) **c.** Normalized dot/ROI *Krt17* RNA expression visualized by RNAScope technology (see supplemental methods for details and source data are provided as a source data file). (n=3 mice were analyzed per condition). Unpaired t test two-tailed error bars, mean  $\pm$  SEM \*\*p=0.0011 \*\*\*p<0.0001. At least 6 areas of each region (anal canal, TZ and rectum) were quantified per mice (n=3 mice were quantified per condition). Source data for the *Krt17* RNA quantification is provided as a Source Data file. Scale bars are 50 $\mu$ m.

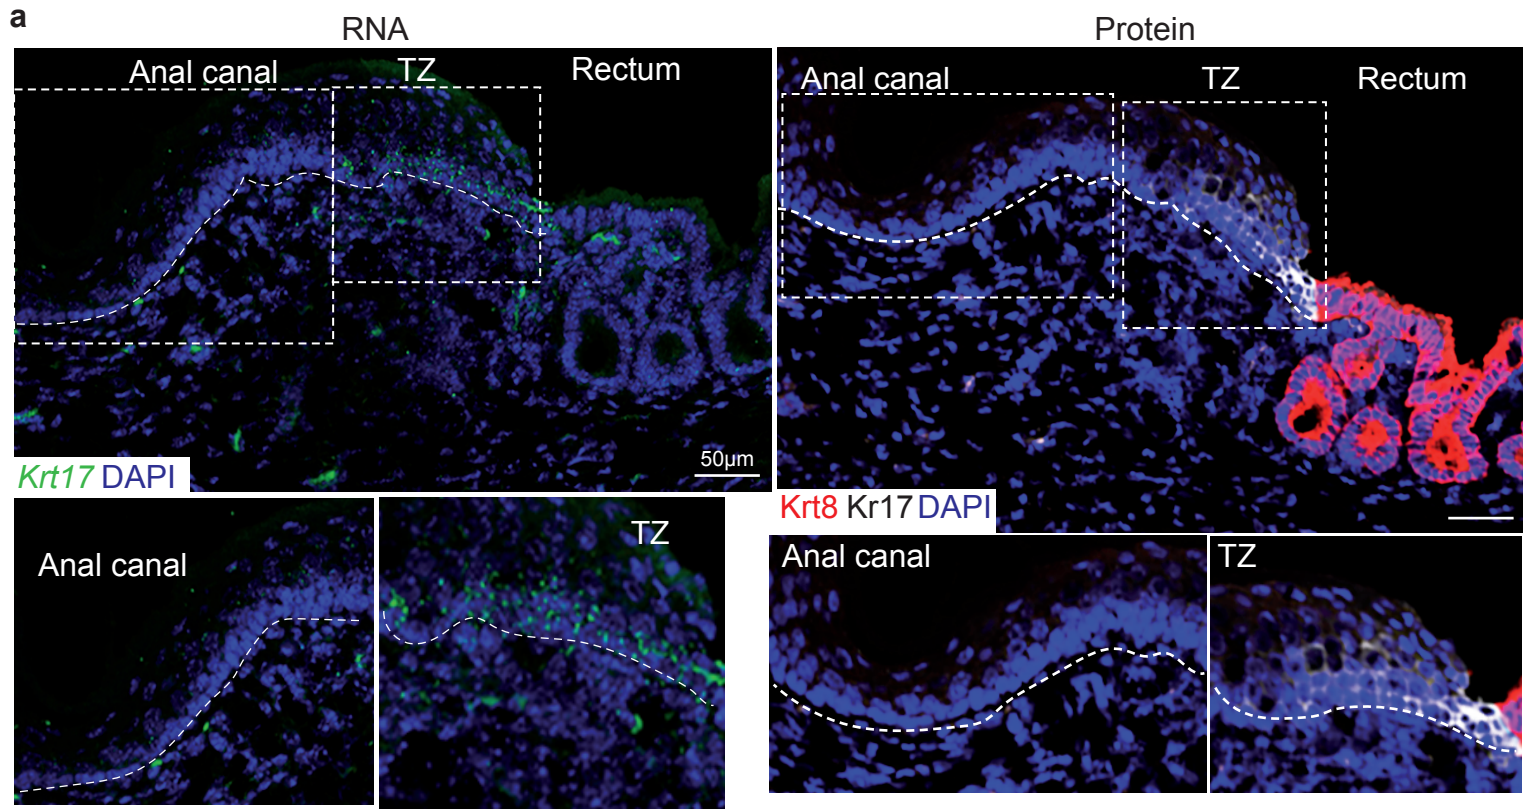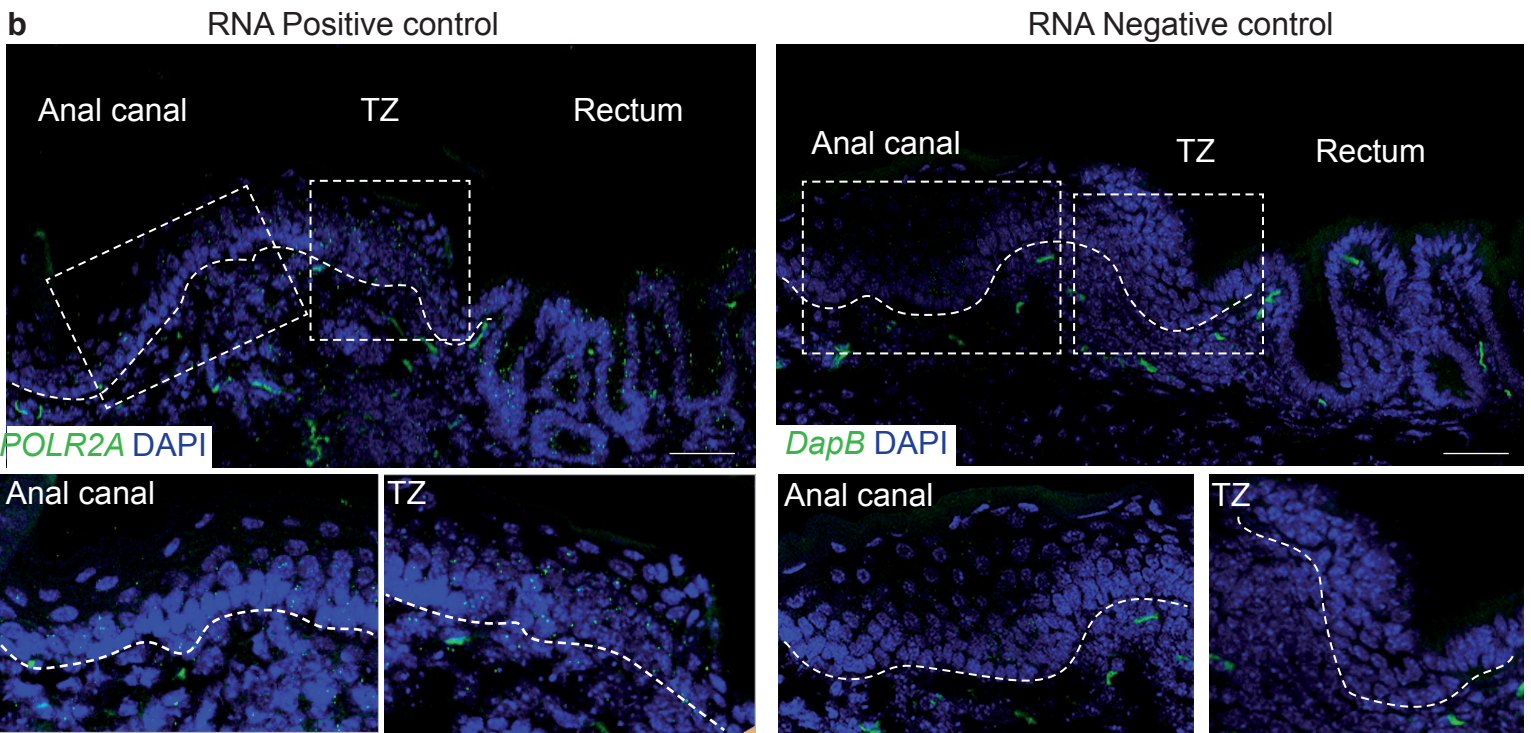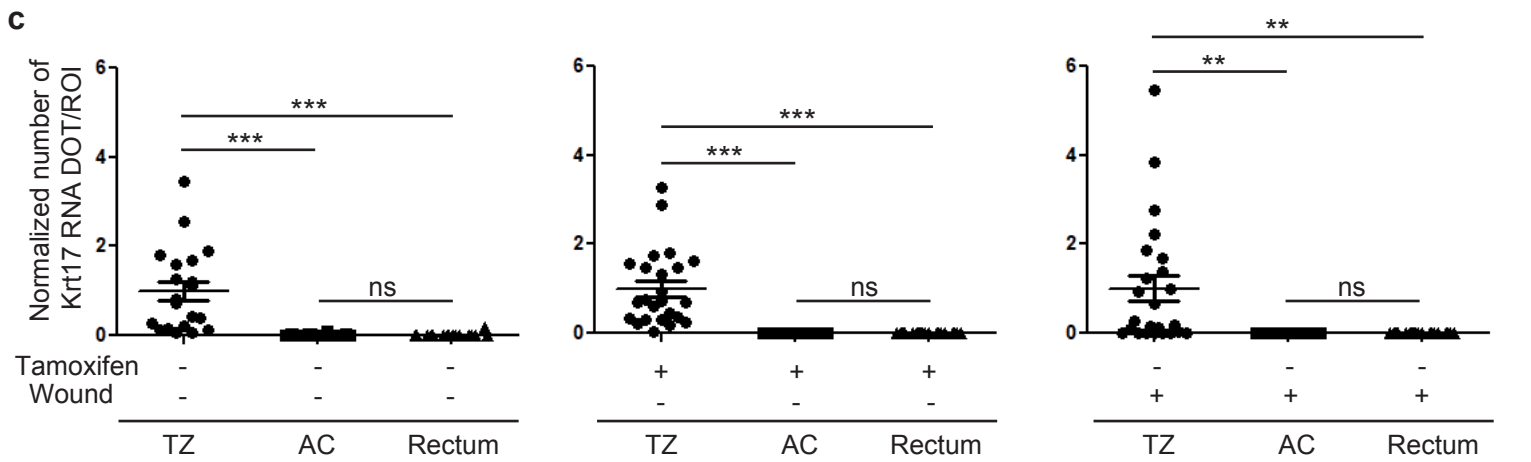

**Supplementary Figure 3. Tamoxifen injection does not induce a wound response. a.**

Tamoxifen does not induce Krt17 expression in the anal canal and in rectum. Krt17 protein integrated density was measured by ImageJ in unwound conditions in the presence and absence of tamoxifen injected twice and 48h post-wound without tamoxifen in transition zone, anal canal (**ai**) and rectum (**aii**). Unpaired t test two-tailed  $*p \leq 0.0376$  **b.** Quantification of EdU expression shows that tamoxifen injection does not change the proliferation status of Krt17+ TZ cells. At 48h post-wound, rectal cells are highly proliferative compared to TZ. Representative images of Edu positive cells (nuclear white staining at the TZ and rectum) **c-d.** Quantification of CD34 and EdU expression shows that tamoxifen injection does not change either the proliferation status of CD34+ TZ cells or the CD34 expression. Note that upon wounding, CD34 is expressed in the anal canal cells. Unpaired t test two-tailed  $*p = 0.0256$   $**p \leq 0.0039$   $***p \leq 0.0006$ . Quantifications for **a**, **b**, **c** and **d** were done using at least 8 areas of each region (anal canal, TZ and rectum) per mice (n=3 mice were quantified per condition). (Source data are provided as a source data file).

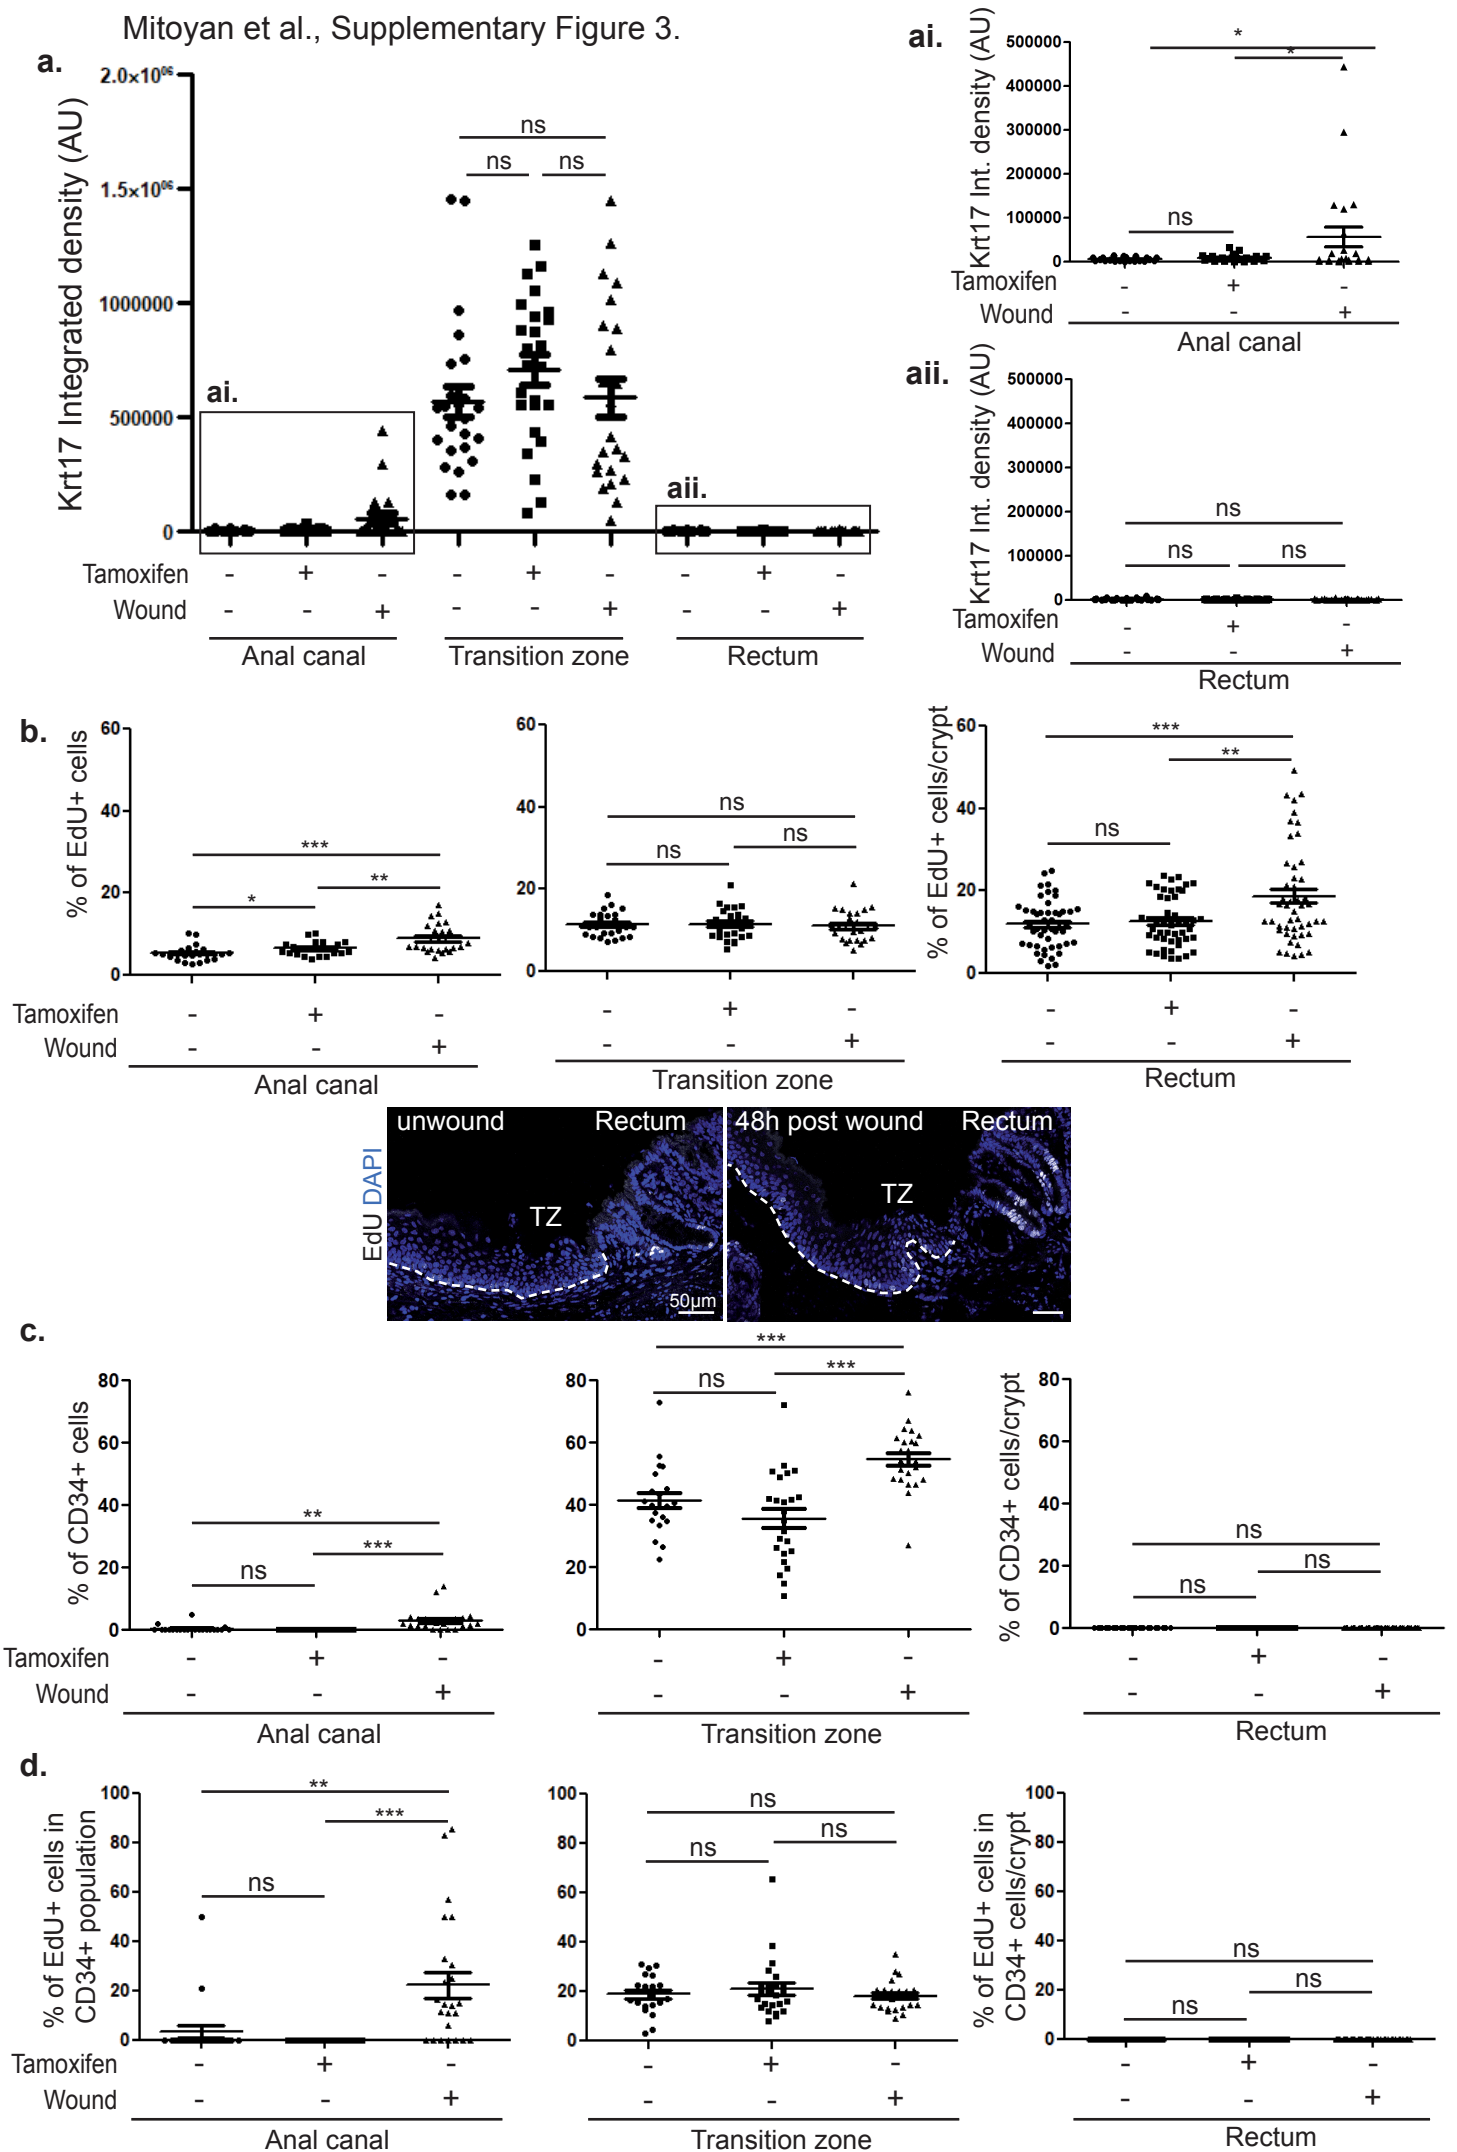

#### **Supplementary Figure 4. Strategy to isolate the anorectal region**

Representative example of the FACS strategy to isolate TZ cells, anal canal and rectum from *K17CreER<sup>T2</sup>;R26R<sup>GFP</sup>* mice induced with tamoxifen for 2 days (n=20). CD45<sup>+</sup> blood cells, CD11b<sup>+</sup> macrophages, CD31<sup>+</sup> endothelial cells and PDGFR $\alpha$ <sup>+</sup> fibroblasts were excluded from the live (FVD-780-), K17<sup>+</sup>GFP<sup>+</sup> population. These epithelial cells were further purified by gating for EpCam<sup>+</sup> cells. Anal canal cells are EpCam<sup>+</sup>GFP<sup>-</sup> and rectum cells are EpCam<sup>High</sup>GFP<sup>-</sup>. An example of the purity of each population is described.



Mitoyan et al., Supplementary Figure 4

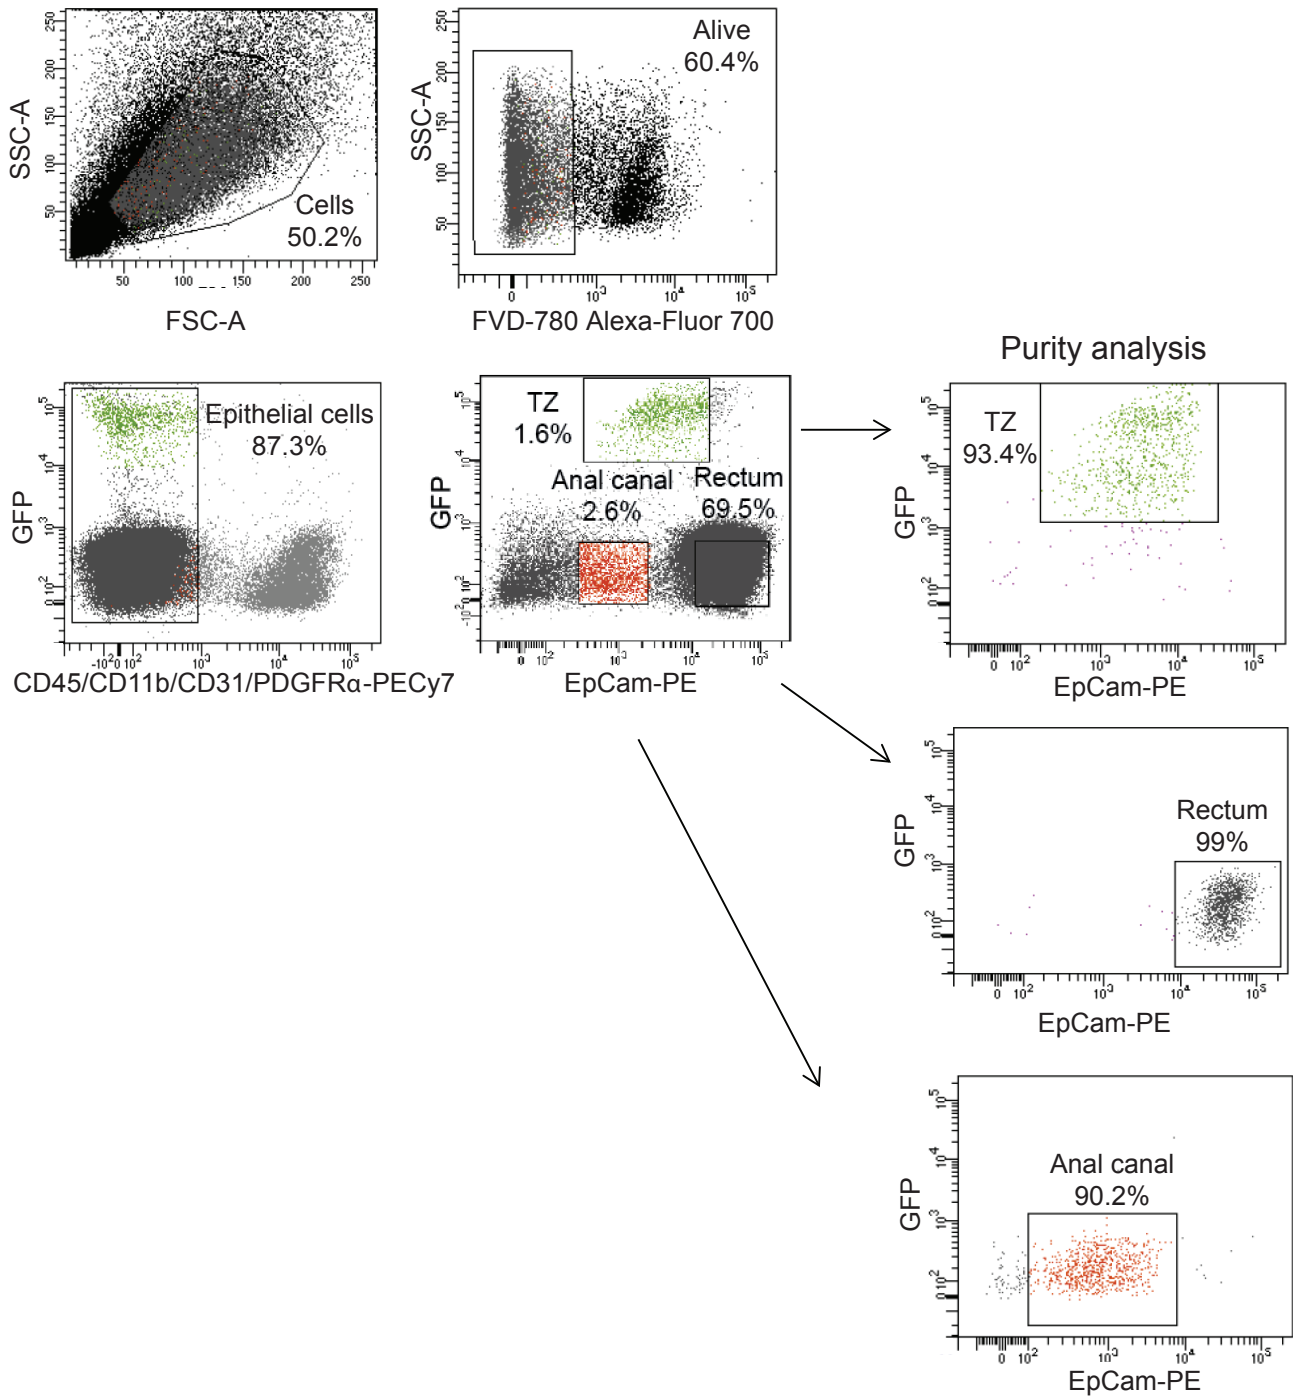

### Supplementary Figure 5. Single-Cell RNA seq of FACS-sorted anorectal cells

**a.** Main cell populations visualized on Uniform Manifold Approximation and Projection (UMAP) dimensional reduction from scRNA sequencing of anorectal epithelial cells. **b.** To determine the pathways associated with the cluster 1, we perform a gene functional classification using DAVID algorithm. Bar plot represents enrichment for each of the pathway identified, where the strength of the association is represented by the  $\log_{10}$  (p-value). A majority of genes defining cluster 1 appears to be involved in lipid synthesis, a characteristic of the anal gland (Source data are provided as a source data file). A two-sided Fisher's exact test was used for data analysis. **c.** Immunofluorescence with perilipin-2 antibody (red), found in cluster 1, confirms that it represents the anal gland populations positive for oil Red O (n=3 independent experiments from n=3 mice). Scale bars are 50  $\mu\text{m}$  for the immunofluorescence and 20  $\mu\text{m}$  for the oil Red O staining. **d-e.** Expression of key genes expressed in the cluster 7 representing the fibroblast (**d**) and the cluster 3 representing the hair follicle (**e**). Source data for the genes in clusters 1, 3 and 7 is provided as a Source Data file. Darker color in the UMAP plot indicates higher expression level of the selected gene. **f.** Immunofluorescence of Lhx2 that specifically marks the hair follicle but is absent in TZ (n=4 independent experiments from n=3 mice), confirms the hair follicle nature of cluster 3. **g.** RNAscope shows expression of *Lgr5* in the hair follicle bulge and at the base of the rectal crypt but not in the anal TZ (n=3 independent experiments from n=3 mice).

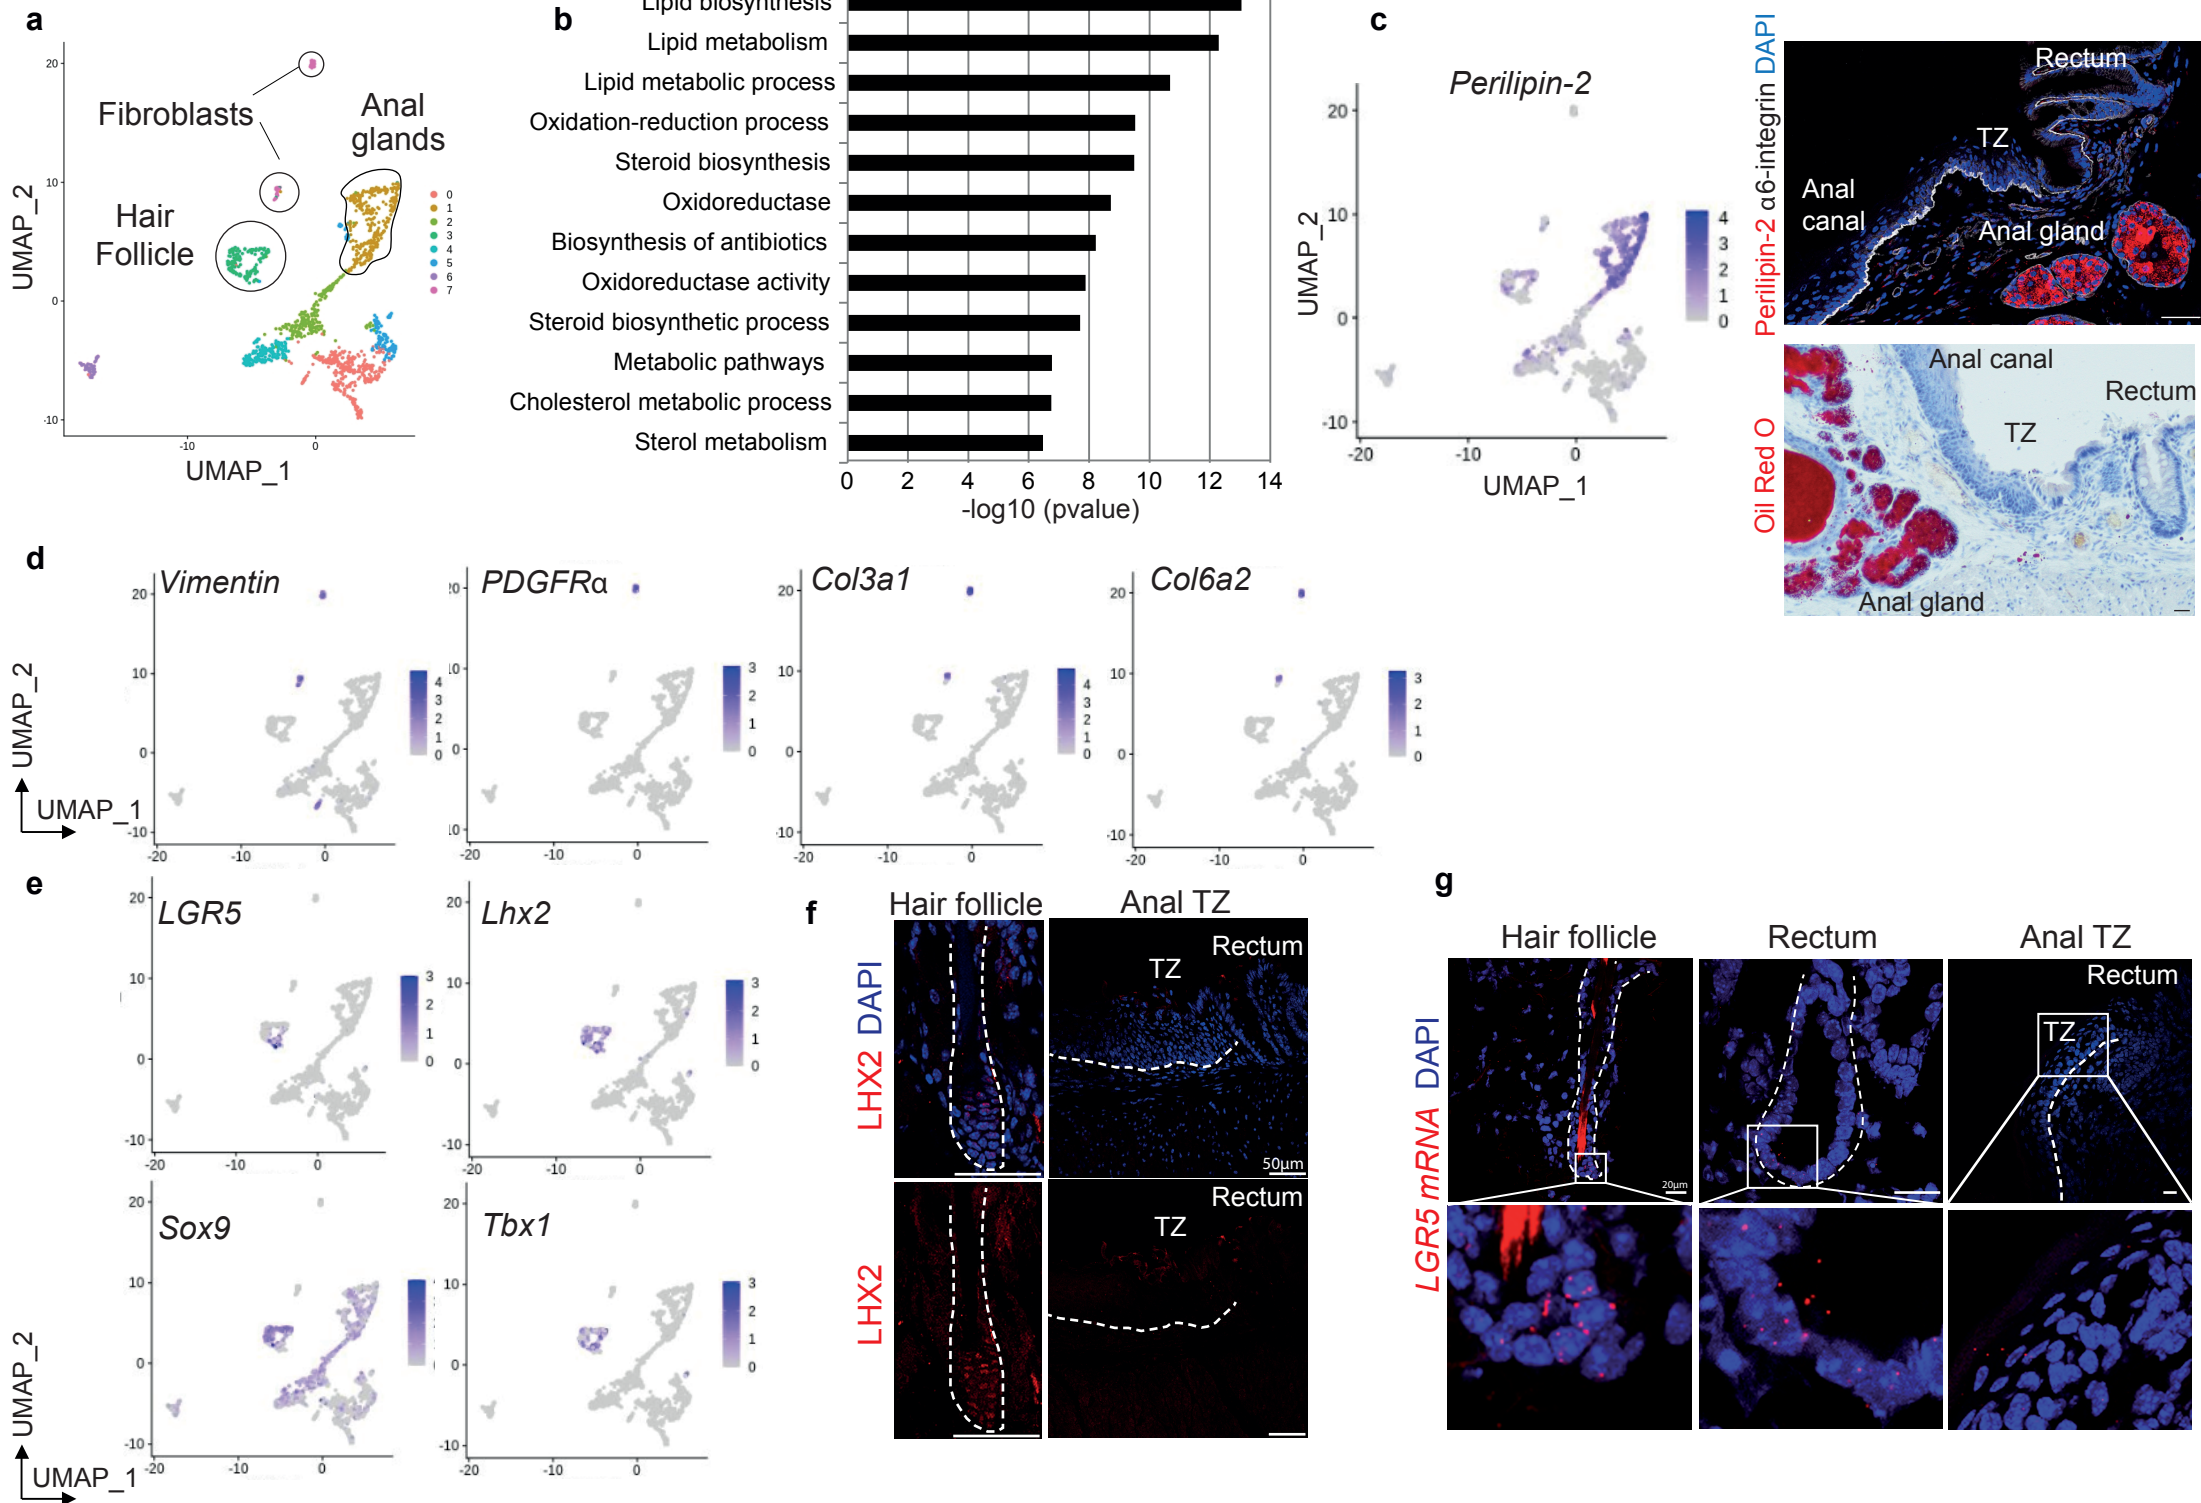

### **Supplementary Figure 6. Markers of the anal canal and TZ.**

**a.** Tamoxifen induces GFP expression specifically in transition zone-derived organoids. Anal canal cells were sorted by previously established FACS strategy. As a positive control, Epcam<sup>low</sup> cells from non-induced *K17CreER<sup>T2</sup>;R26R<sup>GFP</sup>* mice were sorted. At passage 1, culture media was supplemented with tamoxifen or oil control during 7 days. Brightfield and GFP images were acquired at day 7 with the Leica M205FA stereomicroscope and showed the specific induction of GFP expression in transition zone organoids in the presence of Tamoxifen compared to oil control condition and anal canal-derived organoids (n=3 independent experiments from 3 independent FACS sortings). **b.** Subcloning strategy to test the self-renewal potential of anal TZ cells compared to the anal canal and rectal cells. At passage 0, organoids were individually isolated under a Leica stereomicroscope M205FA, dissociated into single cells and replated in new matrigel (P1). This process was repeated as long as organoids grew. **c.** Cells were sorted according to previous established FACS strategy but adding Nectin antibody here. After stroma exclusion, epithelial cells were purified by gating for EpCam<sup>low</sup>GFP<sup>+</sup> cells. These epithelial cells were further purified by gating for Nectin4<sup>+</sup> and Nectin4<sup>-</sup> cells. **d.** Clonogenicity assay shows that TZ basal organoids have unlimited clonogenic property whereas TZ suprabasal organoids cannot survive passage 2 (n=2).

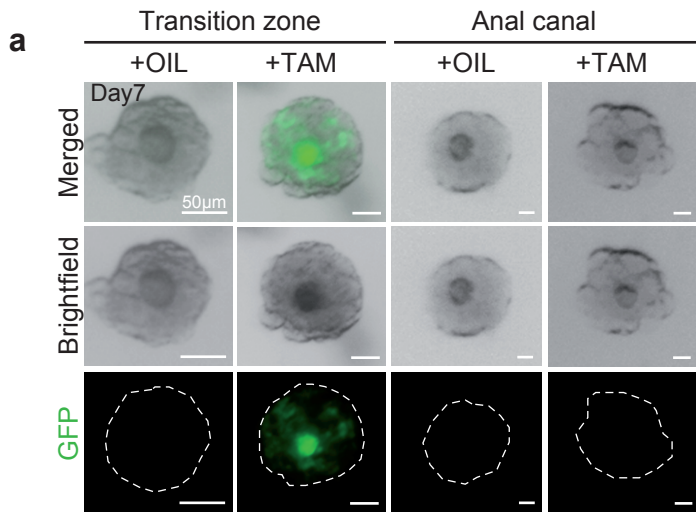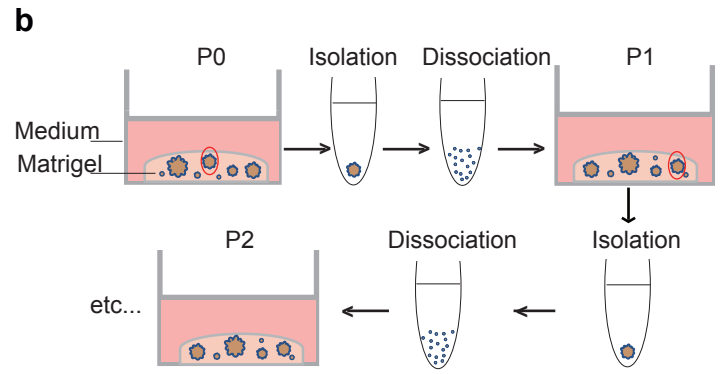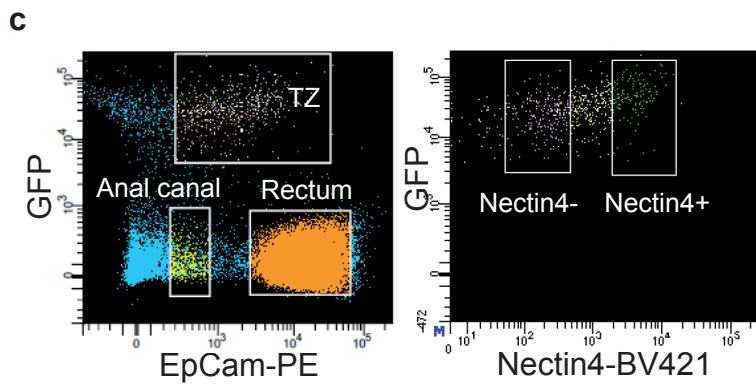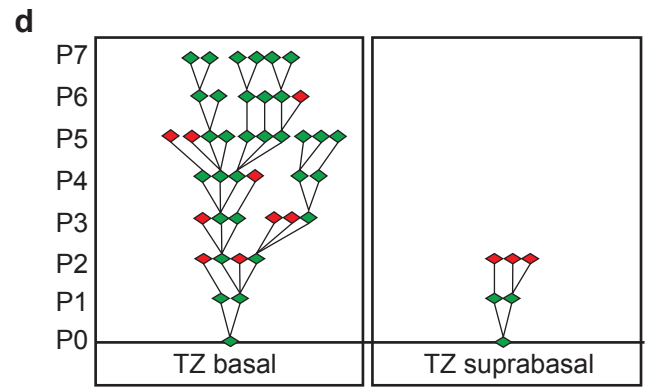

**Supplementary Figure 7. Mechanical wound at the anal TZ shows multipotency of anal TZ**

**a.** Wound strategy in *K17CreER<sup>T2</sup>;R26R<sup>GFP</sup>* bigenic mice induced with tamoxifen 2 days before injury. **b.** HES at day 0 shows wounded region in the rectum epithelium close to the TZ (n=3 mice analyzed). **c.** Similar to the EDTA wound, Few TZ-derived GFP+ cells were found in the rectum epithelium in a transition state co-expressing the glandular marker Krt8 (red) and the TZ marker Krt17 (white) (n=5/13 mice analyzed) Insets are zoom in 4 fold (left panel) and 2.5 fold (right panel). TZ cells give rise to differentiated goblet cells (alcian blue+) (n=3 independent experiments). GFP+ TZ cells participating in the regenerative crypt after a mechanical wound are JunB+ (white) and CD34+ (red) (n=3 independent experiments). Scale bars are 250  $\mu\text{m}$  for **b** and 50 $\mu\text{m}$  for **c**.

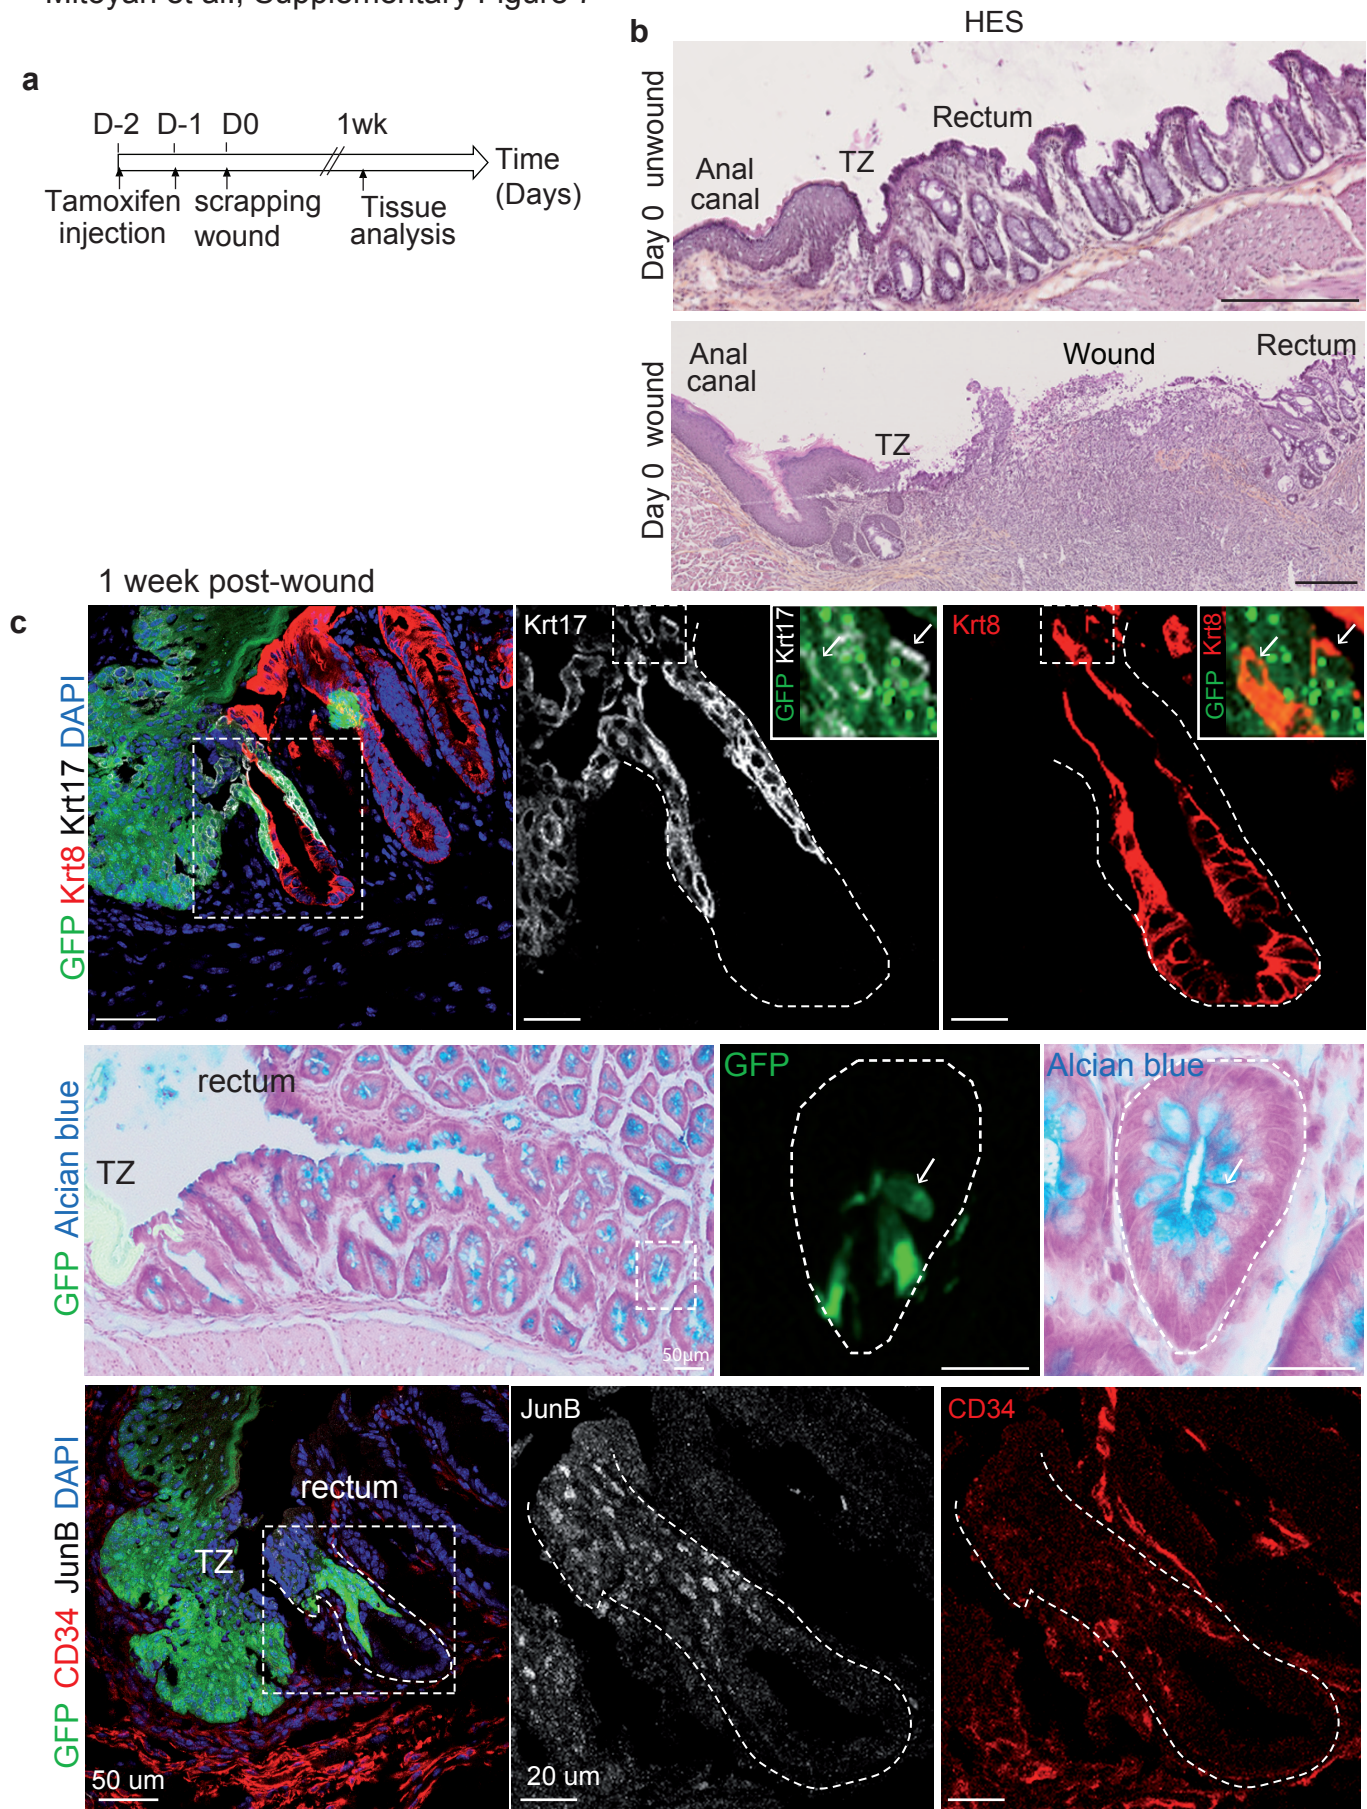

**Supplementary Figure 8. Analysis of the single-Cell RNA seq of FACS-sorted anorectal cells 1 week post-EDTA wound**

**a-b.** Representative example of the FACS strategy to isolate TZ cells, anal canal and rectum from *K17CreER<sup>T2</sup>;R26R<sup>GFP</sup>* mice induced with tamoxifen for 2 days, wounded with EDTA and analyzed 1 week later. **b.** Epcam expression profile is maintained at 1 week post EDTA wound in stratified and glandular epithelia (n=3 independent experiments from n=3 mice). **c.** Main cell populations visualized on Uniform Manifold Approximation and Projection (UMAP) dimensional reduction from scRNA sequencing of anorectal wounded epithelial cells. (Source data are provided as a source data file). **d.** Gene functional classification using DAVID algorithm was used to reveal lipid synthesis-associated pathways in cluster 2 which characterizes anal gland cluster. A two-sided Fisher's exact test was used for data analysis. Source data for the genes in clusters 2, 7 and 8 is provided as a Source Data file. **e.** Expression of key genes expressed in the different populations of wounded epithelial anorectal cells. Darker color in the UMAP plot indicates higher expression level of the selected gene. **f.** Clustering analysis showing the top genes significantly associated with the differentiation paths of trajectories 2 and 3. Heatmaps represent normalized gene expression in logarithmic scale.



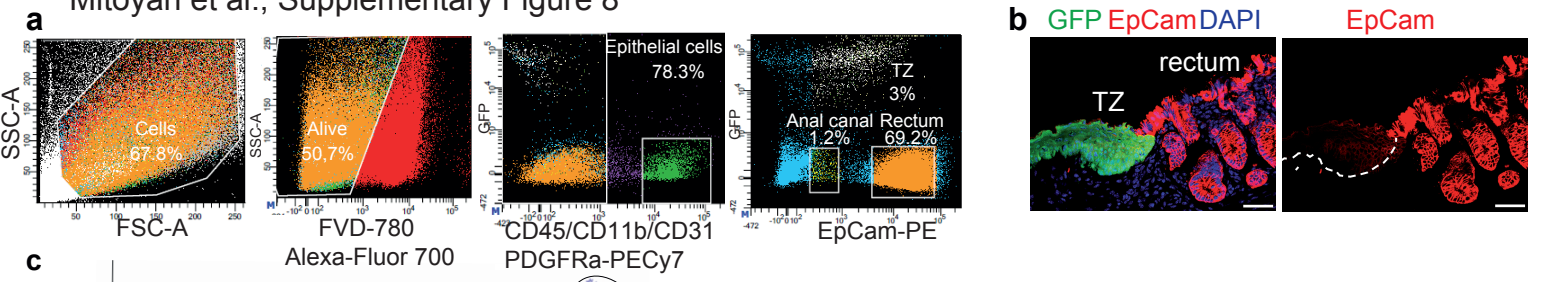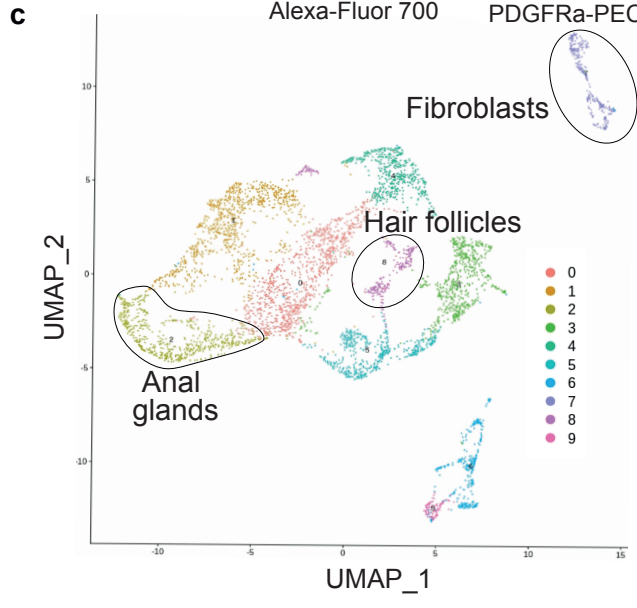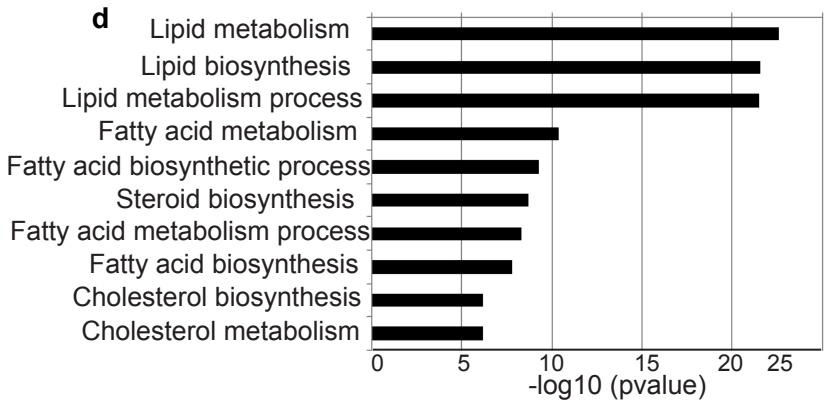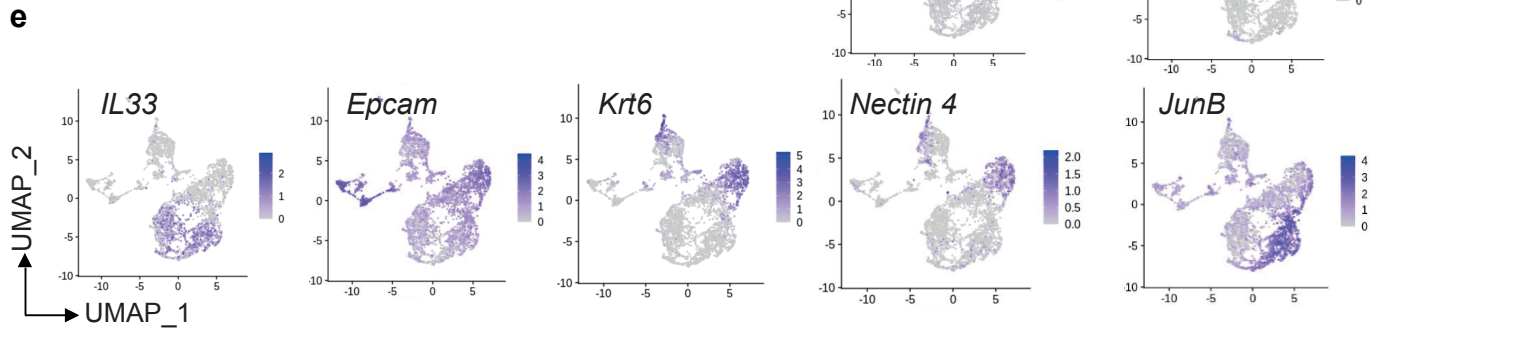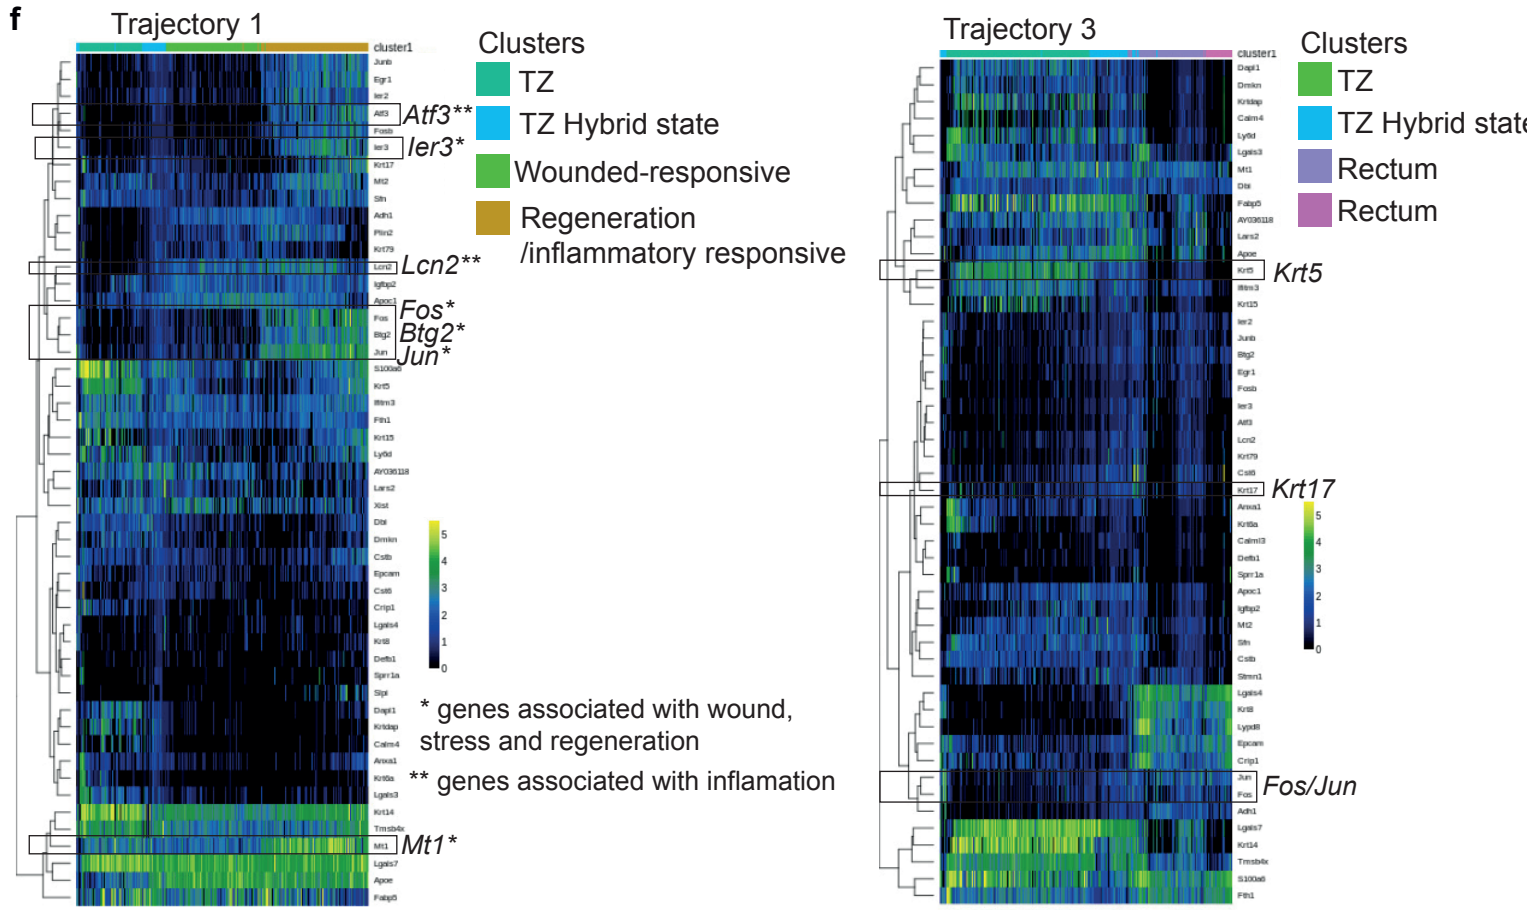

Supplementary Table 1 – Antibodies

| Primary Antibody    | Host Species | Supplier                                          | Catalogue number | Dilution |
|---------------------|--------------|---------------------------------------------------|------------------|----------|
| $\alpha$ 6-integrin | Rat          | BD Biosciences                                    | 555734           | 1/100    |
| SP-1 Chromogranin A | Rabbit       | Euromedex                                         | 20086-IMMUNO     | 1/200    |
| PE-EpCam<br>CD326   | Rat          | Biolegend                                         | 118206           | 1/100    |
| Biotin-CD34         | Rat          | eBioscience                                       | 13-0341          | 1/50     |
| Gpc3                | Mouse        | Thermofischer                                     | MA5-17083        | 1/1000   |
| JunB                | Rabbit       | Cell Signaling                                    | 3753             | 1/500    |
| Keratin8            | Rat          | Developmental Studies<br>Hybridoma Bank<br>(DSHB) | AB_531826        | 1/50     |
| Keratin8            | Rat          | Millipore                                         | MABT329-25UG     | 1/400    |
| Keratin10           | Rabbit       | OZYME<br>BIOLEGEND                                | 905401           | 1/1000   |
| Keratin10           | Rabbit       | OZYME<br>BIOLEGEND                                | 905404           | 1/500    |
| Keratin14           | Mouse        | Millipore                                         | MAB3232          | 1/400    |
| Keratin17           | Rabbit       | Abcam                                             | Ab53707          | 1/20000  |
| Keratin 6           | Rabbit       | Biolegend                                         | 905701           | 1/500    |
| Lhx2                | Rabbit       | Millipore                                         | ABE1402          | 1/2000   |
| Loricrin            | Rabbit       | OZYME<br>BIOLEGEND                                | 905101           | 1/500    |

|                                      |        |                       |               |        |
|--------------------------------------|--------|-----------------------|---------------|--------|
| Lysozyme                             | Rabbit | DAKO                  | A0099         | 1/500  |
| Nectin-4 clone N4.mu1                | Mouse  | Dr. Marc Lopez's gift | NA            | 1/200  |
| PE-Cy7-CD11b                         | Rat    | BD Pharmingen         | 561098        | 1/200  |
| PE-Cy7-CD31                          | Rat    | BD Pharmingen         | 561410        | 1/100  |
| PE-Cy7-CD45                          | Rat    | eBioscience           | 25-0451       | 1/200  |
| PE-Cy7-PDGFRa<br>(CD140a)            | Mouse  | Biologend (Ozyme)     | BLE323507     | 1/50   |
| eFLUOR780<br>(Fixable Viability Dye) |        | Thermofisher          | 65-0865       | 1/1000 |
| Perilipin-2                          | Rabbit | Novus                 | NB110-40877SS | 1/1000 |
| GAPDH                                | Mouse  | Santa Cruz            | sc-32233      | 1/5000 |

| Secondary Antibody | Host   | Coupled with | Supplier               | Reference   | Dilution |
|--------------------|--------|--------------|------------------------|-------------|----------|
| Anti-rat IgG       | Donkey | Cy3          | Jackson ImmunoResearch | 712-166-153 | 1/1000   |
|                    |        | Alexa 647    |                        | 712-606-153 |          |
| Anti-rabbit IgG    | Donkey | Cy3          | Jackson ImmunoResearch | 711-606-152 | 1/1000   |
|                    |        | Alexa 647    |                        | 711-606-152 |          |
| Dapi 1mg/ml        |        |              | Thermo Scientific      | 62248       | 1/2000   |
| APC-Streptavidin   |        |              | BD Pharmingen          | 554067      | 1/200    |
| Anti-mouse BV-421  | Rat    |              | BD Biosciences         | 562580      | 1/100    |
| Anti-mouse IgG     | Donkey | Peroxidase   | Jackson ImmunoResearch | 715-036-151 | 1/10000  |
| Anti-rabbit IgG    | Donkey | Peroxidase   | Jackson ImmunoResearch | 711-036-152 | 1/10000  |

Supplementary Table 2 – Organoid cell culture media

| Medium component                     | Supplier           | Catalogue number | Final concentration |
|--------------------------------------|--------------------|------------------|---------------------|
| Advanced DMEM/F12                    | Gibco™             | 12634010         | 1x                  |
| Glutamax 100x                        | Gibco™             | 35050061         | 1x                  |
| Hepes 100x                           | Gibco™             | 15630056         | 1x                  |
| Penicillin/Streptomycin 100x         | Gibco™             | 15070063         | 1x                  |
| Wnt3A conditioned medium             | Hubrecht Institute | MTA              | 50% home made       |
| R-spondin conditioned medium         | Millipore          | SCC111           | 20% home made       |
| Noggin conditioned medium            | Hubrecht Institute | MTA              | 10% home made       |
| B27 supplement without vitamin A 50x | Gibco™             | 12587010         | 1x                  |

|                    |           |          |           |
|--------------------|-----------|----------|-----------|
| N2 supplement 100x | Gibco™    | 17502048 | 1x        |
| n-Acetyl Cysteine  | Sigma     | A9165    | 1,25 mM   |
| Nicotinamide       | Sigma     | N0636    | 10 mM     |
| EGF                | Gibco™    | PMG8043  | 50 ng/mL  |
| FGF2               | Sigma     | SRP4037  | 50 ng/mL  |
| IGF-1              | Biolegend | 590906   | 100 ng/mL |
| Prostaglandine E2  | Tocris    | 2296     | 10 nM     |
| Gastrin 1          | Sigma     | G9145    | 100 nM    |
| A83-01             | Tocris    | 2939     | 500 nM    |
| SB202190           | Sigma     | S7067    | 3 µM      |
| Primocin 500x      | Invivogen | ant-pm-1 | 1x        |
| LY27632            | Sigma     | Y0503    | 10 µM     |

Supplementary Table 3 – qPCR primer sequences

| Gene         | Primer sequence                                                    |
|--------------|--------------------------------------------------------------------|
| <i>GAPDH</i> | Forward CGTAGACAAAATGGTGAAGGTCGG<br>Reverse AAGCAGTTGGTGGTGCAGGATG |
| <i>Krt5</i>  | Forward GGCCCACAGAGACTGCTTCTTT<br>Reverse AACATTTTGGGGTCTGGGTCAC   |
| <i>Krt17</i> | Forward CTTCCGTACCAAGTTTGAGAC<br>Reverse CGGTTCTTCTCCGCCATCTTC     |
| <i>Krt8</i>  | Forward GGACATCGAGATCACACCT<br>Reverse TGAAGCCAGGGCTAGTGAGT        |
